# Supplementary material for: Downsizing Sustainable Aviation Fuel Production with Additive Manufacturing—An Experimental Study on a 3D printed Reactor for Fischer-Tropsch Synthesis
Source: MDPI journal article supplement (doi:10.3390/en16196798), 2023-09-25
Supplement: s1 [file s1]

Archive with 1 entries (1 files):
- energies-2609587-supplementary.pdf
