# Supplementary material for: Downsizing Sustainable Aviation Fuel Production with Additive Manufacturing—An Experimental Study on a 3D printed Reactor for Fischer-Tropsch Synthesis
Source: MDPI journal article supplement (doi:10.3390/en16196798), 2023-09-25
Supplement: s1 [file s1 › energies-2609587-supplementary.pdf]

## Article

# Downsizing Sustainable Aviation Fuel Production with Additive Manufacturing—An Experimental Study on a 3D printed Reactor for Fischer-Tropsch Synthesis: Supplementary Information

David F. Metzger <sup>1,\*</sup>, Christoph Klahn <sup>2</sup> and Roland Dittmeyer <sup>1</sup>
<sup>1</sup> Institute for Micro Process Engineering (IMVT), Karlsruhe Institute of Technology (KIT), Herrmann-von-Helmholtz-Platz 1, 76344 Eggenstein-Leopoldshafen, Germany

<sup>2</sup> Institute of Mechanical Process Engineering and Mechanics (MVM), Karlsruhe Institute of Technology (KIT), Strasse am Forum 8, 76131 Karlsruhe, Germany

\* Correspondence: david.metzger@kit.edu; Tel.: +49-721-608-23047

## Materials

The materials employed in the experiments are described in Table S1.

Table S1: Materials.

| Name                        | Company                          | Product                                                                                                                                                          |
|-----------------------------|----------------------------------|------------------------------------------------------------------------------------------------------------------------------------------------------------------|
| Male threaded connectors    | Swagelok                         | SS-6M0-1-2RS, SS-12M0-1-8RS                                                                                                                                      |
| Metal gasket                | Swagelok                         | 304L-2-RSNB-2, 304L-8-RSNB-2                                                                                                                                     |
| Sinter metal                | GKN                              | SIKA-R 100 AX, $t = 2$ mm                                                                                                                                        |
| Graphite sealing            | Frenzelit                        | Novaphit VS, $t = 2$ mm                                                                                                                                          |
| Thermocouples               | Conatex                          | Type K (NiCr-Ni) OD 0.5 mm; 1 mm                                                                                                                                 |
| Heating cartridges          | Kleinesdar                       | OD ¼", 100 W @ 230 VAC                                                                                                                                           |
| Thermal conductivity paste  | IBF Chemotechnik Elektronik GmbH | Ferotherm 4                                                                                                                                                      |
| Mass flow controllers (MFC) | Brooks                           | $\dot{V}_{N_2} = 30 \frac{\text{mL}_N}{\text{min}}$ ; $\dot{V}_{H_2} = 600 \frac{\text{mL}_N}{\text{min}}$ ; $\dot{V}_{CO} = 300 \frac{\text{mL}_N}{\text{min}}$ |
| Oil thermostat              | Lauda                            | Proline P12C                                                                                                                                                     |
| Thermal oil                 | Fragol                           | Fragoltherm 660                                                                                                                                                  |
| Insulation material         | Isover                           | U Protect Pipe Sect- Alu2                                                                                                                                        |
| Preprocessing software      | DMG MORI                         | RDesigner (version 1.23.01, Revision 2017)                                                                                                                       |
| Printer operating Software  | DMG MORI                         | ROperator (version 1.0.2.376, Revision 943 (2018))                                                                                                               |
| Printer                     | DMG MORI                         | Realizer SLM 125                                                                                                                                                 |
| Purge gas                   | Air Liquide                      | Argon 5.0                                                                                                                                                        |
| Metal powder                | Carpenter Additive               | CT PowderRange 316LF                                                                                                                                             |
| NC mill                     | Deckel                           | FP5                                                                                                                                                              |
| Laboratory scale            | Kern und Sohn                    | ABS-N ABJ-NM                                                                                                                                                     |

## AM Scan Strategy

Table S2 contains details on the additive manufacturing strategy employed in this work.

Table S2: Scan strategy: order and details of features.

| Detail     | Value | Unit |
|------------|-------|------|
| 0. General |       |      |

|                                            |             |                   |
|--------------------------------------------|-------------|-------------------|
| Heating                                    | True        |                   |
| $h_{\text{layer}}$                         | 0.05        | mm                |
| Heat function                              | True        |                   |
|                                            | 1. Hatch    |                   |
| Exposure time $ET$                         | 10          | $\mu\text{s}$     |
| Point distance $PD$                        | 10          | $\mu\text{m}$     |
| Scan velocity $SV$                         | 1           | $\text{m s}^{-1}$ |
| Power $P$                                  | 110         | W                 |
| Lens position $LP$                         | 0.6         | mm                |
| To 1. Advanced hatch definition            |             |                   |
| Initial offset                             | 0.12        | mm                |
| Hatch distance                             | 0.08        | mm                |
| Rotation                                   | 93          | °                 |
| Scan direction                             | Alternating |                   |
| Multiply method                            | Random      |                   |
| Shifted                                    | True        |                   |
| Patch size                                 | 8 x 5       | mm                |
| 2.+3. Fill line                            |             |                   |
| $ET$                                       | 50          | $\mu\text{s}$     |
| $PD$                                       | 10          | $\mu\text{m}$     |
| $SV$                                       | 0.2         | $\text{m s}^{-1}$ |
| $P$                                        | 110         | W                 |
| $LP$                                       | 0.2         | mm                |
| Base offset                                | 0.08        | mm                |
| 4.+5. Inner contours, 6.+7. outer contours |             |                   |
| $ET$                                       | 50          | $\mu\text{s}$     |
| $PD$                                       | 10          | $\mu\text{m}$     |
| $SV$                                       | 0.2         | $\text{m s}^{-1}$ |
| $P$                                        | 110         | W                 |
| $LP$                                       | 0.2         | mm                |

### AM Porous Region

Preliminary tests revealed for the hydrodynamic behavior of the frit the following values according to ISO 4022 [1]:  $\Psi_V = 0.5 \cdot 10^{-12} \text{ m}^2$  and  $\Psi_I = 0.1 \cdot 10^{-6} \text{ m}$ . This relates to a pressure drop at  $T = 234 \text{ }^\circ\text{C}$ ,  $p = 20 \text{ bar}$  and  $F = 30 \text{ L}_N \text{ h}^{-1}$  of  $\Delta p = 1000 \text{ Pa}$ . The pressure drop of a packed bed with  $d_p = 100 \text{ }\mu\text{m}$  and  $\varepsilon = 0.5$  is negligible.

### Test Rig

In Figure S1 the process flow diagram of the test rig is shown.

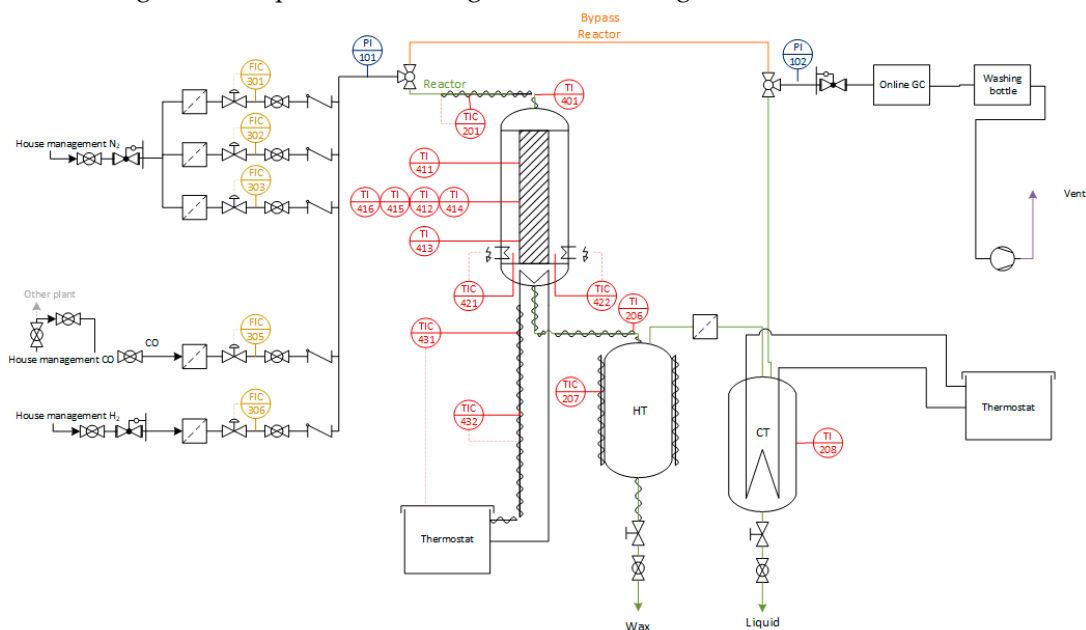

Figure S1: Process flow diagram of test rig.

In Figure S2 the test rig and reactor are shown. The connection of the oil thermostat to the reactor is clearly visible.

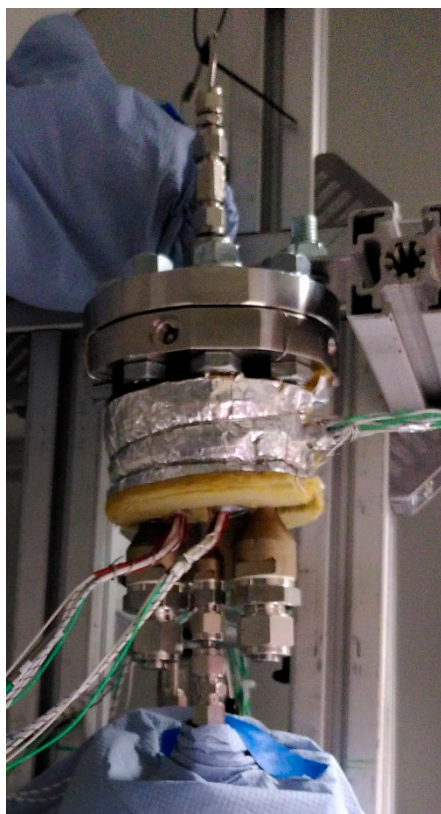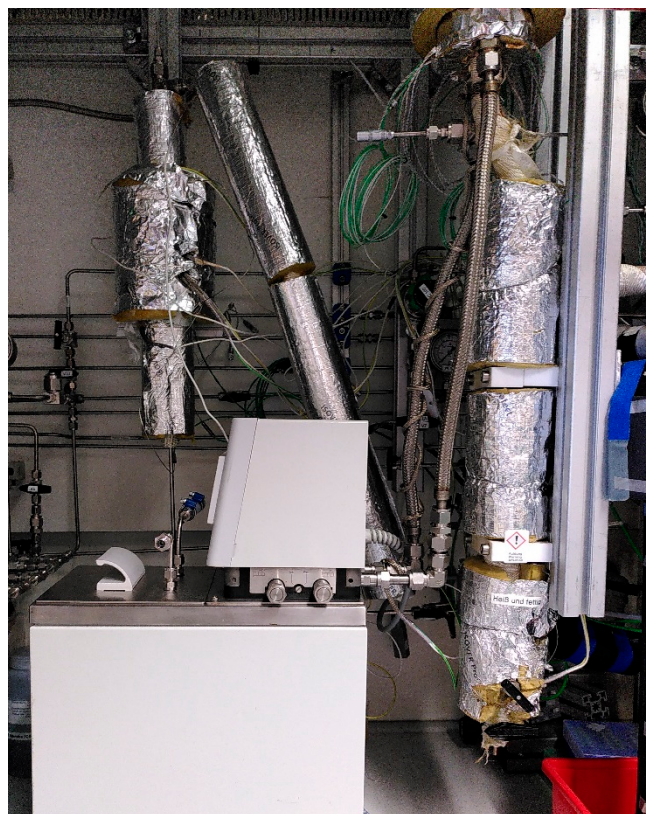

Figure S2: Reactor in test rig. Left: Reactor partially insulated. Right: Reactor (very top) insulated, oil lines and thermostat (bottom) connected.

### GC Results and Product Distribution

Calculating molar flows from online GC:  $\dot{N}_{i,out} = y_{i,out} \cdot \frac{\dot{N}_{N_2}}{y_{N_2,out}}$ . Mass fraction of component with  $i$  C atoms  $\omega_i$  [2,3] correlates with signal area in oil and wax GC [2,4]:

$$\omega_i = \frac{A_i}{\sum_{i=a}^b A_i}$$

$$\omega_i = i \cdot (1 - \alpha)^2 \cdot \alpha^{i-1}$$

$$\alpha = \frac{i-1}{i} \cdot \frac{\omega_i}{\omega_{i-1}}$$

Molar fraction of component with  $i$  C atoms  $x_i$  [5,6]:  $x_i = (1 - \alpha) \cdot \alpha^{i-1}$ . Molar mass of alkane with  $i$  C atoms:  $\tilde{M}_i = i \cdot \tilde{M}_C + (2 \cdot i + 2) \cdot \tilde{M}_H$ ;  $\frac{\tilde{M}_i}{i \cdot \tilde{M}_C} = \dots$  for  $i \rightarrow \infty = 1.17$

### Conversion over TOS

The CO conversion over time on stream is depicted in Figure S3.

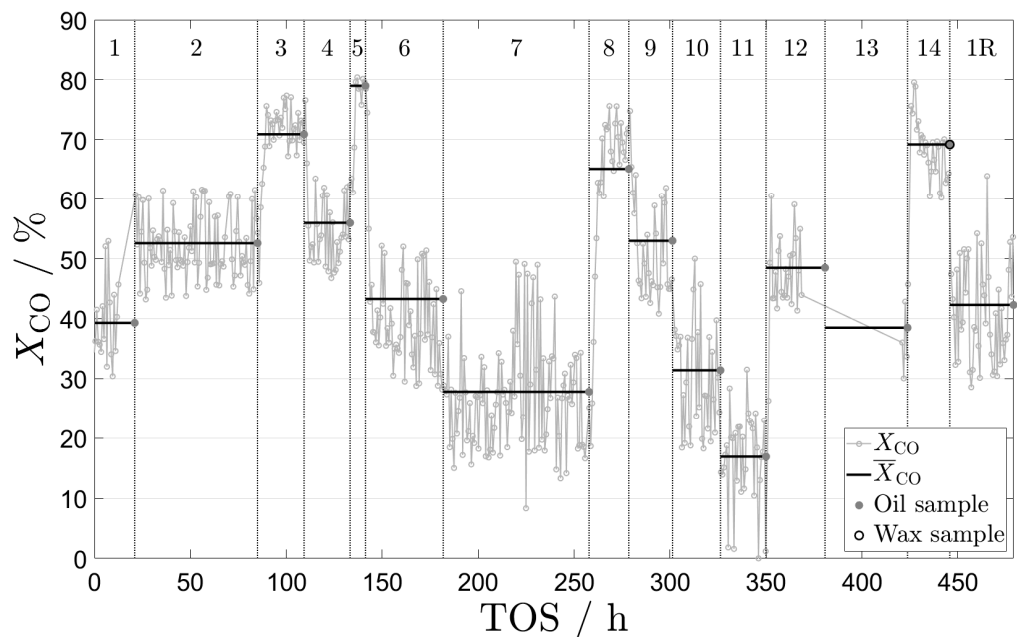

Figure S3: CO conversion over time on stream. Between setpoints 12 and 13 was an extended GC shutdown.

### Fit of Conversion to Temperature and Space Velocity

The experimental data was fitted with the following fit:  $\hat{X}_{CO,fit} = a + b \cdot \hat{SV}_{mod} + c \cdot \hat{T}$  with  $\hat{X}_{CO,fit} = \frac{X_{CO}^{max} - X_{CO}}{X_{CO}^{max} - X_{CO}^{min}}$  and  $\hat{SV}_{mod} = \frac{SV_{mod}^{max} - SV_{mod}}{SV_{mod}^{max} - SV_{mod}^{min}}$  and  $\hat{T} = \frac{T^{max} - T}{T^{max} - T^{min}}$  and  $X_{CO}^{max} = 85$  and  $X_{CO}^{min} = 10$  and  $SV_{mod}^{max} = 10$  and  $SV_{mod}^{min} = 10$  and  $T^{max} = 240$  and  $T^{min} = 185$  and  $a = 0.1868$  and  $b = 1.3446$  and  $c = -0.7421$ . The quality of the fit is depicted in Figure S4.

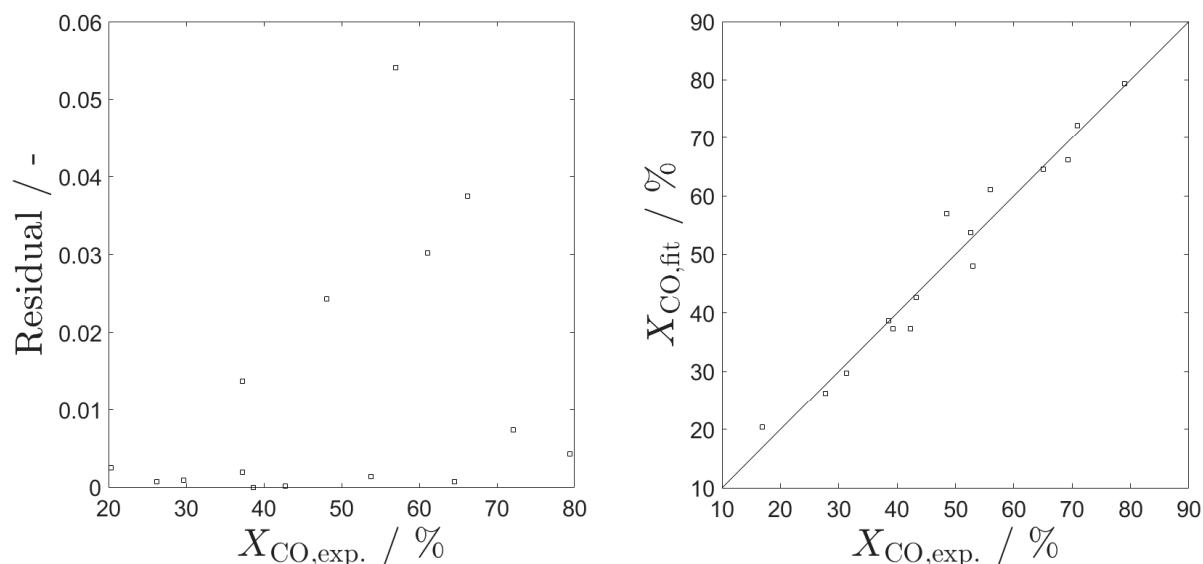

Figure S4: Quality of the fit. Left: Residuals over fitted parameter. Right: Parity plot of experimental and fitted value.

### Comparison with Literature

The space time yield can be calculated from gas flow and CO conversion based on equations Eq. 1 and 2. Assumptions Eqs. 3-8 are derived from an ideal Anderson-Schulz-Flory (ASF) product distribution for a chain growth probability of  $\alpha = 0.85$ . The values of  $\alpha$  and  $S_{C5+}$  obtained in experiments confirm these assumptions.

$$STY_{calc} = X_{CO} \cdot SV_{mod} \cdot \rho_{cat} \cdot y_{CO,in} \cdot S_{C5+} \cdot M_{C5+} \cdot \frac{1}{n_{C5+} \cdot V_N} \quad \text{Eq. 1}$$

$$STY_{calc} / \text{kg}_{C5+} \text{ m}_{rct}^{-3} \text{ h}^{-1} = X_{CO} / \% \cdot SV_{mod} / \text{L}_N \text{ g}_{cat}^{-1} \text{ h}^{-1} \cdot 1.226 \quad \text{Eq. 2}$$

$$\text{With: } \rho_{cat} = 750 \frac{\text{kg}_{cat}}{\text{m}_{rct}^3}, y_{CO,in} = 0.323; S_{C5+} \approx 0.8;$$

Eqs. 3-8

$$M_{C5+} = 151 \frac{\text{g}_{C5+}}{\text{mol}}; n_{C5+} = 10.65; V_N = 22.41 \frac{\text{L}_N}{\text{mol}}$$

The calculated space time yield is depicted in the area generated by modified space velocity and the CO conversion in Figure S5. The STY increases to the top right of the corner. The CO conversion that can be achieved at a certain  $SV_{mod}$  and  $T$  depends on the catalyst. The activity of the catalysts used are in increasing order: work of Almeida et al. [7], this work, work of Myrstad et al. [8].

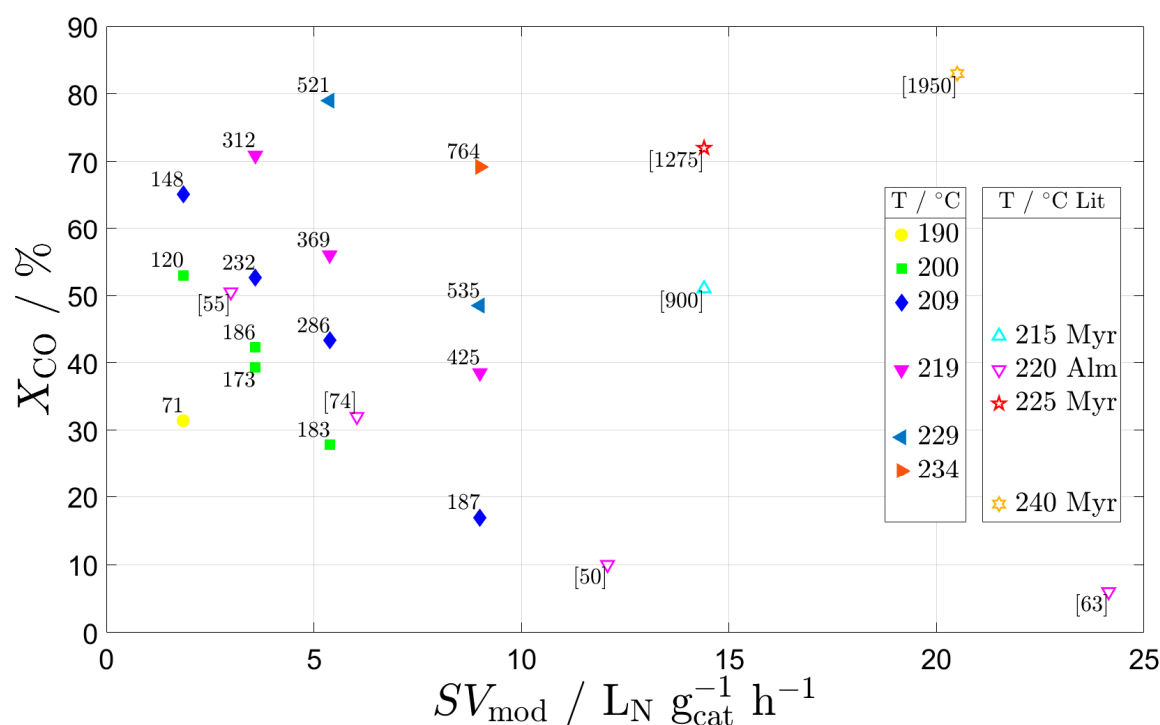

Figure S5: Experimental CO conversion in the plane generated by modified space velocity and temperature with  $STY$  in  $kg_{C5+} m_{cat}^{-3} h^{-1}$  next to the respective data point. Literature values from Almeida et al. and Myrstad et al. [7,8].

In the following Table S3 we make estimations on a scaled-up AM reactor and compare it to industrial FTS reactors. For these reactors we found data on the productivity per reactor mass  $MP$  in barrel per day (bpd).

Table S3: Reactor in this work.

| Calculation                                                                                                                                                                                                                                                      | Comment/Source                                                                                                                                                                                                                                                                                                                                                                                                                                                                            |
|------------------------------------------------------------------------------------------------------------------------------------------------------------------------------------------------------------------------------------------------------------------|-------------------------------------------------------------------------------------------------------------------------------------------------------------------------------------------------------------------------------------------------------------------------------------------------------------------------------------------------------------------------------------------------------------------------------------------------------------------------------------------|
| $P = 3.4 \text{ g}_{C5+} h^{-1}$<br>$m_{cat} = 3.4 \text{ g}_{cat}$<br>$STY_{mod} = 1 \text{ g}_{C5+} g_{cat}^{-1} h^{-1}$<br>$STY = 0.75 \text{ g}_{C5+} cm_{cat}^{-3} h^{-1}$                                                                                  | With $\rho_{cat} = 0.75 \text{ g cm}^{-3}$<br>Assuming infinitely extended planar slits, a repetition unit is made up of a reaction slit containing 10 % internal structures, two walls and a cooling slit containing 10 % internal structures. All slits are 1 mm deep and wall thickness is 1 mm. Hence, approx. $2.2 \text{ cm}^3$ metal per $\text{cm}^3$ catalyst are needed. With $\rho_{metal} = 8 \text{ g cm}^{-3}$ approx. $17.6 \text{ g metal per cm}^3$ catalyst are needed. |
| $MP = 0.0426 \text{ g}_{C5+} g_{metal}^{-1} h^{-1} =$<br>$42.6 \text{ kg}_{C5+} t^{-1} h^{-1}$<br>$1 \text{ bl} = 159 \text{ L}$<br>$1 \text{ bl} = 127.2 \text{ kg}$<br>$1 \text{ bpd (bl per day)} = 5.3 \text{ kg h}^{-1}$<br>$MP = 8.038 \text{ bpd t}^{-1}$ | With $\rho = 0.8 \text{ kg m}^{-3}$<br>With $24 \text{ h d}^{-1}$                                                                                                                                                                                                                                                                                                                                                                                                                         |

Table S4: Shell Pearl GTL.

| Calculation                                                    | Comment/Source |
|----------------------------------------------------------------|----------------|
| 140,000 bpd                                                    | [9]            |
| $m_{\text{reactor}} = 1200 \text{ t}$ (24 in total)            | [10]           |
| $MP = 5833 \text{ bpd per reactor} = 4.861 \text{ bpd t}^{-1}$ |                |

Table S5: Sasol Oryx GTL.

| Calculation                                                    | Comment/Source |
|----------------------------------------------------------------|----------------|
| 33,000 bpd                                                     | [11]           |
| $m_{\text{reactor}} = 2000 \text{ t}$ (2 in total)             | [12]           |
| $MP = 16500 \text{ bpd per reactor} = 8.25 \text{ bpd t}^{-1}$ |                |

A scaled-up version of the AM reactor can produce as much FTS product as an industrial-scale reactor with the equal reactor mass. Compact reactors that are manufactured via complex multi-step manufacturing routes, e.g. diffusion bonding, are researched since ca. 20 years. They are reported to have productivities per reactor mass of  $MP = 13$  and  $16.5 \text{ bpd t}^{-1}$  [13].

### Scale-Up

An eight-fold scale-up of the reactor is shown in Figure S6. It would be possible to install about  $m_{\text{cat}} = 30 \text{ g}$ .

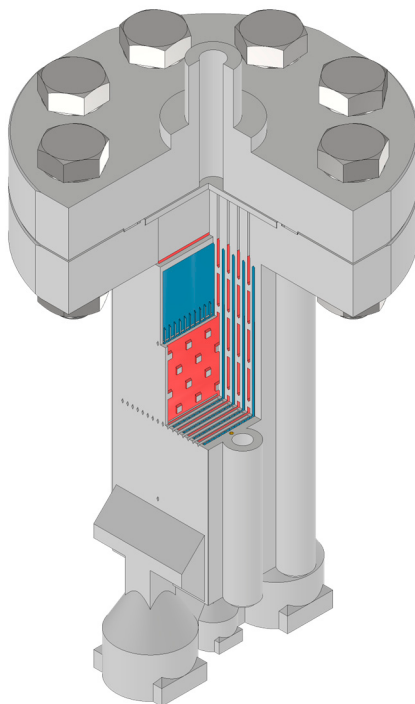Figure S6: Computer-aided design image of reactor concept for  $m_{\text{cat}} = 30 \text{ g}$ .

### Evaluation of heat and mass transfer

We evaluated the following criteria to decide whether heat and mass transfer were limiting the chemical reaction. The axial dispersion of mass is insignificant as long as Eq. 9 is fulfilled [14]. The left-hand side equals 380.

$$\frac{l_{\text{cat}}}{d_p} > \frac{8}{Bo_i} \cdot n_i \cdot \ln\left(\frac{1}{1 - X_i}\right) \quad \text{Eq. 9}$$

$$\frac{1}{Bo_i} = \frac{\varepsilon_{\text{bed}} \cdot D_{i,m}}{\tau_{\text{bed}} \cdot d_p \cdot u_0} + 0.5$$

$i = \text{H}_2, \text{CO}$

The internal mass transfer limitation is insignificant if Eq. 10 is fulfilled [15].  $\Psi_{\text{WP}}$  is called Weisz-Prater criterion.

$$\Psi_{\text{WP}} = \frac{\left(\frac{d_p}{6}\right)^2 \cdot \frac{n_i + 1}{2} \cdot r_i^V}{(1 - \varepsilon_{\text{bed}}) \cdot D_{i,\text{eff}} \cdot c_{i,g}} < 0.15 \quad \text{Eq. 10}$$

$i = \text{H}_2, \text{CO}$

External mass transfer limitation is insignificant as long as Eq. 11 is fulfilled [15].

$$\frac{d_p^2 \cdot r_i^V}{12 \cdot (1 - \varepsilon_{\text{bed}}) \cdot D_{i,m} \cdot c_{i,g}} < 1 \quad \text{Eq. 11}$$

$i = \text{H}_2, \text{CO}$

The internal heat transfer limitation is insignificant if Eq. 12 is fulfilled [16].

$$\frac{-\Delta H_R \cdot \left(\frac{d_p}{2}\right)^2 \cdot r_{\text{CO}}^V}{(1 - \varepsilon_{\text{bed}}) \cdot \lambda_{\text{bed}} \cdot T_s} \cdot \frac{E_A}{\tilde{R} \cdot T_s} < 1 \quad \text{Eq. 12}$$

External heat transfer limitation is insignificant as long as Eq. 13 is fulfilled [16].

$$\frac{-\Delta H_R \cdot \frac{d_p}{2} \cdot r_{\text{CO}}^V}{(1 - \varepsilon_{\text{bed}}) \cdot \alpha_{\text{gas}} \cdot T_s} \cdot \frac{E_A}{\tilde{R} \cdot T_s} < 0.05 \quad \text{Eq. 13}$$

Additional values were calculated according to eqs.

$$c_i = \frac{y_i \cdot p}{\tilde{R} \cdot T} \quad \text{Eq. 14}$$

$$\dot{N}_{\text{total}} = \frac{F_{\text{total}}}{V_N} \quad \text{Eq. 15}$$

$$\dot{N}_{\text{CO,conv}} = \dot{N}_{\text{total}} \cdot y_{\text{CO,in}} \cdot X_{\text{CO}} \quad \text{Eq. 16}$$

$$r_{\text{CO}}^V = \frac{\dot{N}_{\text{CO,conv}}}{V_{\text{cat}}}; r_{\text{H}_2}^V = 2 \cdot r_{\text{CO}}^V \quad \text{Eq. 17}$$

$$F_{\text{total}}^{\text{actual}} = F_{\text{total}} \cdot \frac{p_N}{p} \cdot \frac{T}{T_N} \quad \text{Eq. 18}$$

$$u_0 = \frac{F_{\text{total}}^{\text{actual}}}{A_{\text{cross}}} \quad \text{Eq. 19}$$

Table S6: Additional parameters required for criteria calculation.

| Parameter                         | Symbol                                                | Value                                           | Source                                                                                       |
|-----------------------------------|-------------------------------------------------------|-------------------------------------------------|----------------------------------------------------------------------------------------------|
| Bed length                        | $l_{\text{cat}}$                                      | 0.055 m                                         |                                                                                              |
| Bed porosity                      | $\varepsilon_{\text{bed}}$                            | 0.5                                             |                                                                                              |
| Mixture diffusivity               | $D_{\text{H}_2,\text{m}}$                             | $6.86 \cdot 10^{-5} \text{ m}^2 \text{ s}^{-1}$ |                                                                                              |
| Mixture diffusivity               | $D_{\text{CO},\text{m}}$                              | $6.05 \cdot 10^{-5} \text{ m}^2 \text{ s}^{-1}$ |                                                                                              |
| Bed tortuosity                    | $\tau_{\text{bed}}$                                   | 2                                               |                                                                                              |
| Particle diameter                 | $d_p$                                                 | 0.00015 m                                       |                                                                                              |
| Reaction order                    | $n_{\text{H}_2}$                                      | 0.5                                             |                                                                                              |
| Reaction order                    | $n_{\text{CO}}$                                       | 1                                               |                                                                                              |
| Effective pore diffusivity        | $D_{\text{H}_2,\text{eff}}, D_{\text{CO},\text{eff}}$ | $5 \cdot 10^{-9} \text{ m}^2 \text{ s}^{-1}$    |                                                                                              |
| Reaction enthalpy                 | $\Delta H_{\text{R}}$                                 | $-160000 \text{ J mol}_{\text{CO}}^{-1}$        |                                                                                              |
| Bed thermal conductivity          | $\lambda_{\text{bed}}$                                | $1 \text{ W m}^{-1} \text{ K}^{-1}$             |                                                                                              |
| Activation energy                 | $E_A$                                                 | $100 \text{ J mol}_{\text{CO}}^{-1}$            |                                                                                              |
| Inlet molar fraction              | $y_{\text{H}_2}$                                      | 0.646                                           |                                                                                              |
| Inlet molar fraction              | $y_{\text{CO}}$                                       | 0.323                                           |                                                                                              |
| Bed-gas heat transfer coefficient | $\alpha_{\text{gas}}$                                 | $5267 \text{ W m}^{-2} \text{ K}^{-1}$          | With $\lambda_{\text{gas}} = 0.16 \text{ W m}^{-1} \text{ K}^{-1}$ and $Nu_{\text{min}} = 5$ |
| Molar volume                      | $V_{\text{N}}$                                        | $22.41 \text{ L}_\text{N} \text{ mol}^{-1}$     |                                                                                              |
| Cross-sectional area              | $A_{\text{cross}}$                                    | $80 \text{ mm}^2$                               |                                                                                              |

Table S7: Results of criteria indicate, there is no limitation by heat and mass transfer.

| N. | $T / ^\circ\text{C}$ | $SV_{\text{mod}} / L_N$<br>$\text{g}_{\text{cat}}^{-1} \text{h}^{-1}$ | $F_{\text{total}} / L_N$<br>$\text{h}^{-1}$ | $X_{\text{CO}} / \%$ | $X_{\text{H}_2} / \%$ | $c_{\text{H}_2} / \text{mol m}^{-3}$ | $c_{\text{CO}} / \text{mol m}^{-3}$ | $r_{\text{H}_2}^V / \text{mol m}^{-3} \text{s}^{-1}$ | $r_{\text{CO}}^V / \text{mol m}^{-3} \text{s}^{-1}$ | $u_0 / \text{mm s}^{-1}$ | Eq. 9 H <sub>2</sub> | Eq. 9 CO         | Eq. 10 H <sub>2</sub> | Eq. 10 CO | Eq. 11 H <sub>2</sub> | Eq. 11 CO | Eq. 12   | Eq. 13   |
|----|----------------------|-----------------------------------------------------------------------|---------------------------------------------|----------------------|-----------------------|--------------------------------------|-------------------------------------|------------------------------------------------------|-----------------------------------------------------|--------------------------|----------------------|------------------|-----------------------|-----------|-----------------------|-----------|----------|----------|
| 1  | 200                  | 3.59                                                                  | 12.0                                        | 39.3                 | 36.7                  | 329                                  | 164                                 | 8.57                                                 | 4.28                                                | 3.60                     | 59                   | 114              | 0.00                  | 0.01      | 1.43E-06              | 1.62E-06  | 4.14E-04 | 1.05E-03 |
| 2  | 209                  | 3.59                                                                  | 12.0                                        | 52.6                 | 51.5                  | 322                                  | 161                                 | 11.45                                                | 5.73                                                | 3.67                     | 92                   | 167              | 0.01                  | 0.01      | 1.94E-06              | 2.20E-06  | 5.34E-04 | 1.35E-03 |
| 3  | 219                  | 3.59                                                                  | 12.0                                        | 70.9                 | 72.4                  | 316                                  | 158                                 | 15.46                                                | 7.73                                                | 3.75                     | 160                  | 271              | 0.01                  | 0.01      | 2.68E-06              | 3.03E-06  | 6.91E-04 | 1.75E-03 |
| 4  | 219                  | 5.38                                                                  | 17.9                                        | 56.0                 | 55.8                  | 316                                  | 158                                 | 18.30                                                | 9.15                                                | 5.61                     | 68                   | 121              | 0.01                  | 0.01      | 3.17E-06              | 3.59E-06  | 8.18E-04 | 2.07E-03 |
| 5  | 229                  | 5.38                                                                  | 17.9                                        | 79.0                 | 80.6                  | 310                                  | 155                                 | 25.80                                                | 12.90                                               | 5.73                     | 134                  | 226              | 0.02                  | 0.02      | 4.56E-06              | 5.17E-06  | 1.11E-03 | 2.81E-03 |
| 6  | 209                  | 5.38                                                                  | 17.9                                        | 43.3                 | 41.2                  | 322                                  | 161                                 | 14.15                                                | 7.08                                                | 5.50                     | 45                   | 86               | 0.01                  | 0.01      | 2.40E-06              | 2.72E-06  | 6.59E-04 | 1.67E-03 |
| 7  | 200                  | 5.38                                                                  | 17.9                                        | 27.8                 | 26.5                  | 329                                  | 164                                 | 9.07                                                 | 4.54                                                | 5.40                     | 27                   | 50               | 0.01                  | 0.01      | 1.51E-06              | 1.71E-06  | 4.39E-04 | 1.11E-03 |
| 8  | 209                  | 1.85                                                                  | 6.2                                         | 65.1                 | 67.7                  | 322                                  | 161                                 | 7.31                                                 | 3.66                                                | 1.89                     | 276                  | 453 <sup>1</sup> | 0.00                  | 0.01      | 1.24E-06              | 1.41E-06  | 3.41E-04 | 8.62E-04 |
| 9  | 200                  | 1.85                                                                  | 6.2                                         | 53.0                 | 53.5                  | 329                                  | 164                                 | 5.96                                                 | 2.98                                                | 1.86                     | 190                  | 331              | 0.00                  | 0.00      | 9.91E-07              | 1.12E-06  | 2.88E-04 | 7.30E-04 |
| 10 | 190                  | 1.85                                                                  | 6.2                                         | 31.4                 | 31.2                  | 336                                  | 168                                 | 3.52                                                 | 1.76                                                | 1.82                     | 95                   | 169              | 0.00                  | 0.00      | 5.74E-07              | 6.51E-07  | 1.78E-04 | 4.50E-04 |
| 11 | 209                  | 9.00                                                                  | 30.0                                        | 16.9                 | 16.6                  | 322                                  | 161                                 | 9.23                                                 | 4.62                                                | 9.20                     | 9                    | 17               | 0.01                  | 0.01      | 1.57E-06              | 1.78E-06  | 4.30E-04 | 1.09E-03 |
| 12 | 229                  | 9.00                                                                  | 30.0                                        | 48.5                 | 50.5                  | 310                                  | 155                                 | 26.51                                                | 13.25                                               | 9.58                     | 35                   | 59               | 0.02                  | 0.02      | 4.68E-06              | 5.31E-06  | 1.14E-03 | 2.88E-03 |
| 13 | 219                  | 9.00                                                                  | 30.0                                        | 38.5                 | 38.4                  | 316                                  | 158                                 | 21.03                                                | 10.52                                               | 9.39                     | 25                   | 44               | 0.01                  | 0.02      | 3.64E-06              | 4.13E-06  | 9.41E-04 | 2.38E-03 |
| 14 | 234                  | 9.00                                                                  | 30.0                                        | 69.2                 | 71.0                  | 307                                  | 153                                 | 37.82                                                | 18.91                                               | 9.68                     | 61                   | 103              | 0.02                  | 0.03      | 6.75E-06              | 7.65E-06  | 1.59E-03 | 4.03E-03 |
| 1R | 200                  | 3.59                                                                  | 12.0                                        | 42.3                 | 41.2                  | 329                                  | 164                                 | 9.22                                                 | 4.61                                                | 3.60                     | 68                   | 125              | 0.01                  | 0.01      | 1.53E-06              | 1.74E-06  | 4.46E-04 | 1.13E-03 |

<sup>1</sup>Only incident, where criterion is not fulfilled.

## References

1. DIN EN ISO 4022:2018-12; Durchlässige Sintermetallwerkstoffe: Bestimmung der Flüssigkeitsdurchlässigkeit. Beuth Verlag GmbH: Berlin, Germany, 2018. Available online: <https://www.nautos.de/OJG/search> (accessed on 20.08.2023).
2. Kirsch, H. Dezentrale Synthese Strombasierter Flüssiger Kraftstoffe über die Fischer-Tropsch Route. Doctoral Dissertation, Karlsruher Institut für Technologie: Karlsruhe, Germany, 2020. <https://doi.org/10.5445/IR/1000129949>
3. Flory, P.J. Molecular Size Distribution in Linear Condensation Polymers. *J. Am. Chem. Soc.* **1936**, *58*, 1877–1885. <https://doi.org/10.1021/ja01301a016>
4. Kaiser, R. E. *Gas-Chromatographie*. 2. Aufl. Bd. 22. B I Hochschultaschenbücher. Mannheim: Bibliogr. Inst, 1973. ISBN: 3-411-00022-8.
5. Brübach, L.T. Katalytische Hydrierende Spaltung von Fischer-Tropsch Produkten im Technikumsmaßstab. Master's Thesis, Karlsruher Institut für Technologie, Karlsruhe, Germany, 2018.
6. Pabst, K.; González, M.I.; Kraushaar-Czarnetzki, B.; Schaub, G. Combination of Fischer-Tropsch Synthesis and Hydroprocessing in a Single-Stage Reactor. Part I. Mathematical Modeling of the Reaction Kinetics. *Ind. Eng. Chem. Res.* **2013**, *52*, 8978–8987. <https://doi.org/10.1021/ie303047a>
7. Almeida, L.C.; Echave, F.J.; Sanz, O.; Centeno, M.A.; Arzamendi, G.; Gandía, L.M.; Sousa-Aguiar, E.F.; Odriozola, J.A.; Montes, M. Fischer-Tropsch synthesis in microchannels. *Chem. Eng. J.* **2011**, *167*, 536–544. <https://doi.org/10.1016/j.cej.2010.09.091>
8. Myrstad, R.; Eri, S.; Pfeifer, P.; Rytter, E.; Holmen, A. Fischer-Tropsch synthesis in a microstructured reactor. *Catal. Today* **2009**, *147*, S301–S304. <https://doi.org/10.1016/j.cattod.2009.07.011>
9. Shell. Pearl GTL Overview. Available online: <https://www.shell.com/about-us/major-projects/pearl-gtl/pearl-gtl-an-overview.html> (accessed on 3 July 2023).
10. MAN Energy Solutions. Shell Pearl GTL—Gas-to-liquid reactor in Qatar for Shell. Available online: <https://www.man-es.com/process-industry/products/chemical-reactors/water--air--oil-operated-reactors> (accessed on 3 July 2023).
11. Hydrocarbons Technology. Oryx. Available online: <https://www.hydrocarbons-technology.com/projects/oryx/> (accessed on 3 July 2023).
12. Technip. Oryx GTL, 2011. Available online: <https://docplayer.net/45263490-Our-projects-oryx-gtl.html> (accessed on 25 August 2023).
13. Selinsek, M. Compact Fischer-Tropsch Synthesis in Gas-to-Liquid Applications. In Proceedings of the 2nd Thematic Workshop, Prague and Litvinov, Czech Republic, 23–24 May 2019. Available online: <https://www.comsynproject.eu/publications/> (accessed 20 August 2023).
14. Berger, R. EUROKIN Spreadsheet on Requirements for Measurement of Intrinsic Kinetics in the Gas-Solid Fixed-Bed Reactor, 2010. Available online: [https://eurokin.org/wp-content/uploads/downloads/2019/08/EUROKIN\\_fixed-bed\\_html\\_guide.pdf](https://eurokin.org/wp-content/uploads/downloads/2019/08/EUROKIN_fixed-bed_html_guide.pdf) (accessed on 15 September 2023).
15. Jess, A.; Wasserscheid, P. *Chemical Technology: An Integral Textbook*; Wiley-VCH: Weinheim, Germany, 2013; ISBN 978-3-527-30446-2.
16. Pfeifer, P. Application of catalysts to metal microreactor systems. In *Chemical Kinetics*; Patel, V., Ed.; InTech Europe: Rijeka, Croatia, 2012; pp 325–345, ISBN 978-953-51-0132-1.

## Nomenclature

### Latin symbols

|             |                                                             |
|-------------|-------------------------------------------------------------|
| $A$         | Area (mm)                                                   |
| $F$         | Volumetric flow rate ( $L_N h^{-1}$ )                       |
| $\tilde{M}$ | Molar mass ( $kg mol^{-1}$ )                                |
| $MP$        | Productivity per reactor mass ( $bpd t^{-1}$ )              |
| $m$         | Mass (kg)                                                   |
| $\dot{N}$   | Molar flow ( $mol s^{-1}$ )                                 |
| $n_C$       | Number of carbon atoms (-)                                  |
| $P$         | Productivity of C5+ ( $kg s^{-1}; g h^{-1}$ )               |
| $p$         | Pressure (bar)                                              |
| $S$         | Selectivity ( $mol/mol$ )                                   |
| $STY$       | Space time yield ( $kg m^{-3} h^{-1}$ )                     |
| $SV$        | Space velocity at normal conditions ( $L_N m^{-3} h^{-1}$ ) |
| $T$         | Temperature ( $^{\circ}C; K$ )                              |
| $TOS$       | Time on stream (h)                                          |
| $V$         | Volume ( $mm^3$ )                                           |

---

|                      |                                                                           |
|----------------------|---------------------------------------------------------------------------|
| $t$                  | Thickness, dimension (mm)                                                 |
| $X$                  | Conversion (-)                                                            |
| $y$                  | Molar fraction (mol/mol)                                                  |
| <b>Greek symbols</b> |                                                                           |
| $\alpha$             | Chain growth probability (-)                                              |
| $\Delta$             | Difference (div.)                                                         |
| $\varepsilon$        | Porosity (-)                                                              |
| $\psi$               | Permeability coefficients ( $\text{m}^{-1}$ ; $\text{m}^{-2}$ )           |
| $\omega$             | Weight fraction (kg/kg)                                                   |
| <b>Subscript</b>     |                                                                           |
| cat                  | Catalyst                                                                  |
| I                    | Inertia permeability coefficient                                          |
| mod                  | Modified, in this work: related to catalyst mass                          |
| N                    | Normal conditions ( $p = 1.01325 \text{ bara}$ , $T = 273.15 \text{ K}$ ) |
| p                    | Particle, pin                                                             |
| V                    | Permeability coefficient of flow                                          |
